# Supplementary material for: Effects of Polystyrene Microplastics on Growth and Toxin Production of Alexandrium pacificum
Source: MDPI journal article supplement (doi:10.3390/toxins13040293), 2021-04-20
Supplement: s1 [file s1]

## Supplementary Materials: Effects of Polystyrene Microplastics on Growth and Toxin Production of *Alexandrium pacificum*

Chao Liu, Jiangbing Qiu, Zhixuan Tang, Hong Hu, Fanping Meng and Aifeng Li

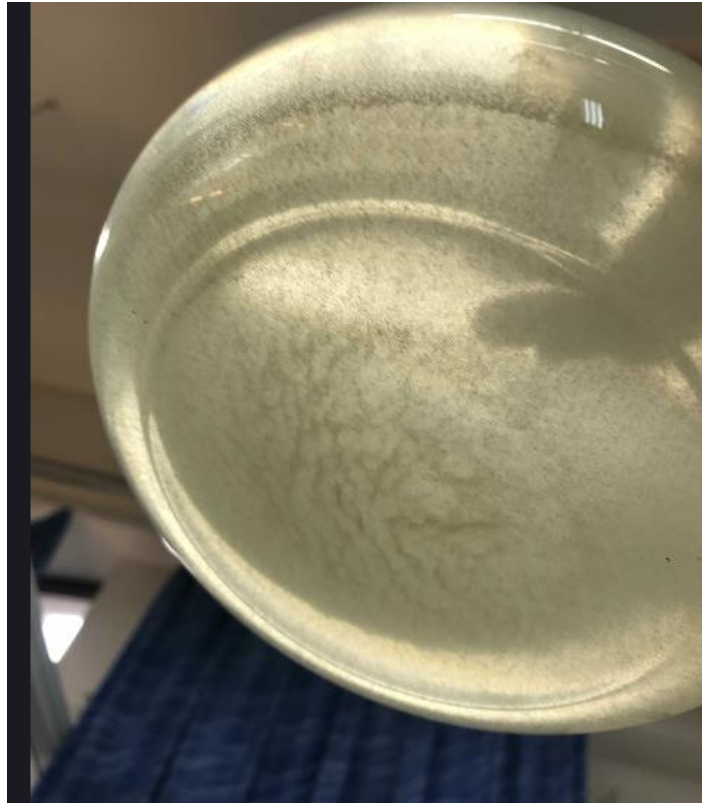

**Figure S1.** Aggregation and sedimentation of microplastic particles in the cultures of *Alexandrium pacificum* ATHK during the later stage.
